# Supplementary material for: In-plane isotropic charge transport characteristics of single-crystal FETs with high mobility based on 2,6-bis(4-methoxyphenyl)anthracene: experimental cum theoretical assessment
Source: Royal Society of Chemistry journal article supplement (doi:10.1039/c6tc04659b), 2016-11-28
Supplement: c6tc04659b1.pdf [file c6tc04659b1.pdf]

## **In-plane Isotropic Charge Transport Characteristics of Single-Crystal FETs with High Mobility Based on 2,6-bis(4-methoxyphenyl)anthracene: Experimental Cum Theoretical Assessment**

Aiyuan Li,<sup>a, †</sup> Lijia Yan,<sup>b, †</sup> Chao He,<sup>a</sup> Yanan Zhu,<sup>a</sup> Dongwei Zhang,<sup>a</sup> Imran Murtaza,<sup>b</sup>  
Hong Meng,<sup>a,b\*</sup> and Osamu Goto<sup>a\*†</sup>

- a. School of Advanced Materials, Peking University Shenzhen Graduate School, Shenzhen, 518055, China
- b. Key Laboratory of Flexible Electronics (KLOFE) & Institute of Advanced Materials (IAM), Jiangsu National Synergetic Innovation Center for Advanced Materials (SICAM), Nanjing Tech University (Nanjing Tech), 30 South Puzhu Road, Nanjing 211816, China

† These authors contribute equally in this work.

| Organic Semiconductor   | Single-crystal growth method | Mobility (cm <sup>2</sup> /Vs) | Ratio of $\mu_{\max}/\mu_{\min}$ | Dielectric layer |
|-------------------------|------------------------------|--------------------------------|----------------------------------|------------------|
| DNTT <sup>1</sup>       | Physical vapour transport    | 9.4                            | 1.3~1.7                          | air              |
| DPVAnt <sup>2</sup>     | Physical vapour transport    | 4.3                            | 1.5~1.95                         | SiO <sub>2</sub> |
| DPA <sup>3</sup>        | Physical vapour transport    | 34                             | 1.46                             | SiO <sub>2</sub> |
| ditBu-BTBT <sup>4</sup> | Physical vapour transport    | 17                             | 1.14 <sup>b</sup>                | SiO <sub>2</sub> |
| DBTTT <sup>5</sup>      | Physical vapour transport    | 13.87 ± 2.34 <sup>a</sup>      | --                               | SiO <sub>2</sub> |

<sup>a</sup> extracted from thin-film TFT;

<sup>b</sup> obtained from calculation.

**Supporting Information Table S1.** Isotropic charge transport (Weak anisotropic charge transport) in single-crystal FETs.

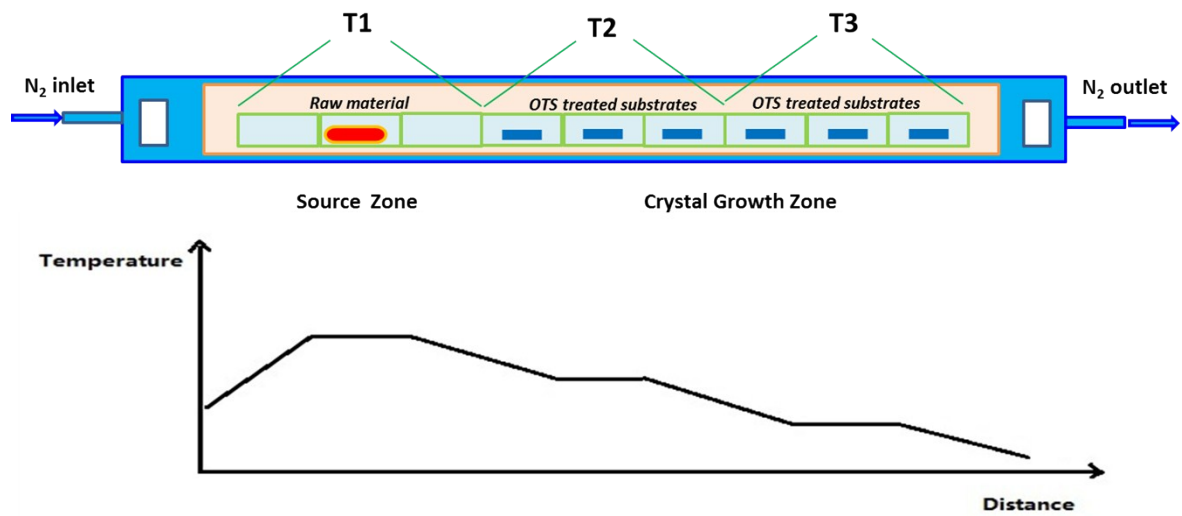

**Supporting Information Figure S1.** Diagram of the three-zone, physical vapour transport, single-crystal growth instrument used in this work.

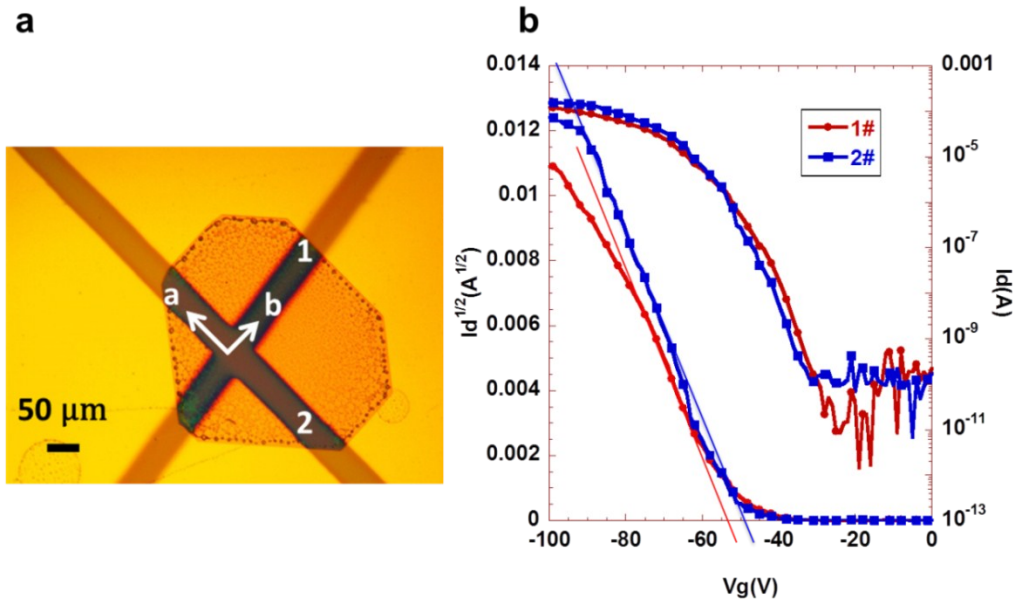

**Supporting Information Figure S2.** Single-crystal FET with gold wires used as the shadow mask. a) A polarized optical micrograph of a device and b) transfer characteristic curves of devices 1# and 2#. The transfer curves were measured under  $V_d = -80$  V.

| Device | Mobility<br>( $\text{cm}^2/\text{Vs}$ ) | $V_{th}$<br>(V) | On/off<br>ratio    |
|--------|-----------------------------------------|-----------------|--------------------|
| 1      | 4.84                                    | -<br>53         | $1.42 \times 10^7$ |
| 2      | 6.03                                    | -<br>53         | $7.11 \times 10^6$ |

**Supporting Information Table S2.** Performance of devices #1 and #2 ( $\mu_2/\mu_1=1.24$ ).

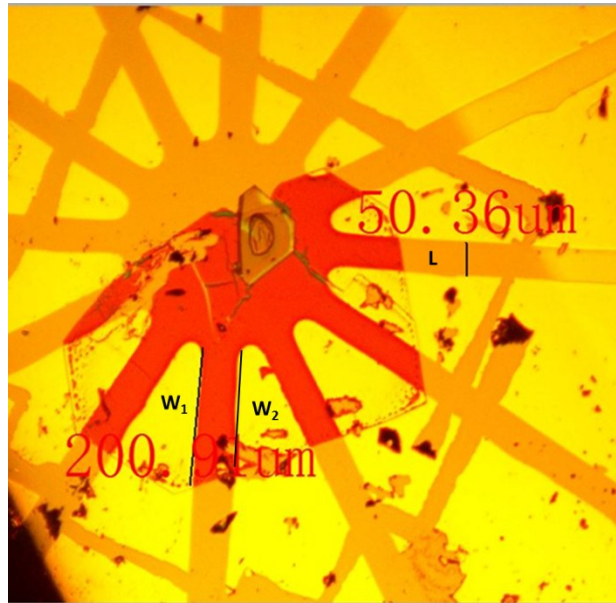

**Supporting Information Figure S3.** Polarized microscope picture of the device and the W and L measurement using the POM's software. W is determined as  $W = (W_1+W_2)/2$ .

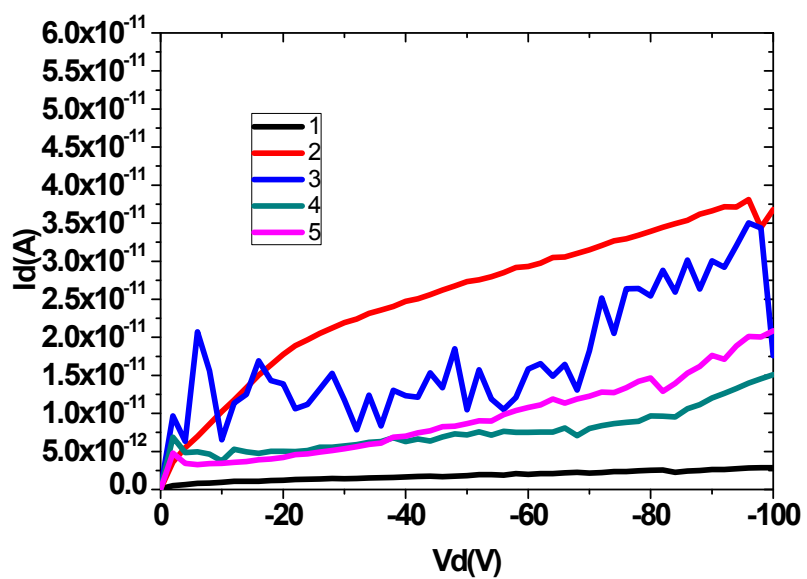

Supporting Information Figure S4. I-V curves without  $V_g$  ( $V_g=0$ ).

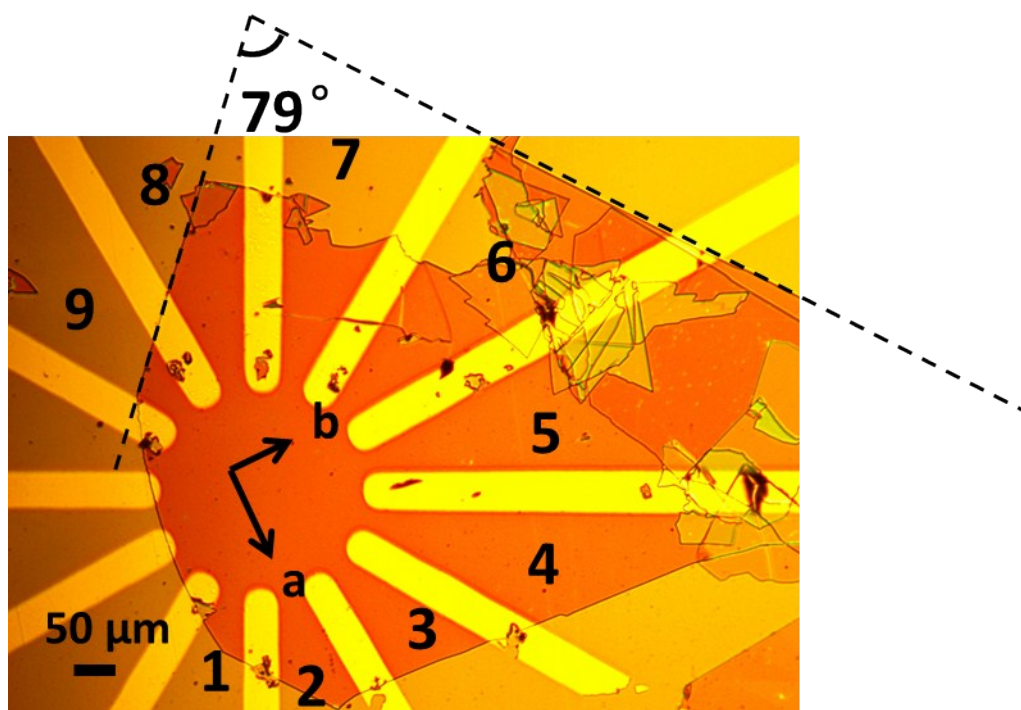

**Supporting Information Figure S5.** Large single-crystal FETs with another type of shadow mask.

| <b>Device</b> | <b>Mobility (cm<sup>2</sup>/Vs)</b> | <b>V<sub>th</sub> (V)</b> | <b>On/off ratio</b>  |
|---------------|-------------------------------------|---------------------------|----------------------|
| 2             | 2.05                                | -60                       | 2.7×10 <sup>5</sup>  |
| 3             | 1.99                                | -55                       | 2.96×10 <sup>6</sup> |
| 4             | 2.90                                | -60                       | 1.38×10 <sup>6</sup> |
| 5             | 2.50                                | -62                       | 1.34×10 <sup>6</sup> |
| 8             | 2.13                                | -58                       | 3.8×10 <sup>5</sup>  |

**Supporting Information Table S3** Performance of devices with another kind of shadow mask; according to the cosines law, the L/W of each device was determined to be 0.27.



|                      | <b>Transfer integral (eV)</b> | <b>Reorganization energy (eV)</b> | <b>Distance (cm)</b> | <b>Hole mobility (cm<sup>2</sup>/Vs)</b> |
|----------------------|-------------------------------|-----------------------------------|----------------------|------------------------------------------|
| <b>P</b>             | 0.013                         | 0.2491                            | 6.16E-08             | 6.59E-04                                 |
| <b>T<sub>1</sub></b> | 0.073                         | 0.2491                            | 4.83E-08             | 3.54E-01                                 |
| <b>T<sub>2</sub></b> | 0.073                         | 0.2491                            | 4.83E-08             | 3.54E-01                                 |

**Supporting Information Table S4** Mobilities for the integrals P, T<sub>1</sub> and T<sub>2</sub>, calculated according to the Marcus–Levich–Jortner simulations.

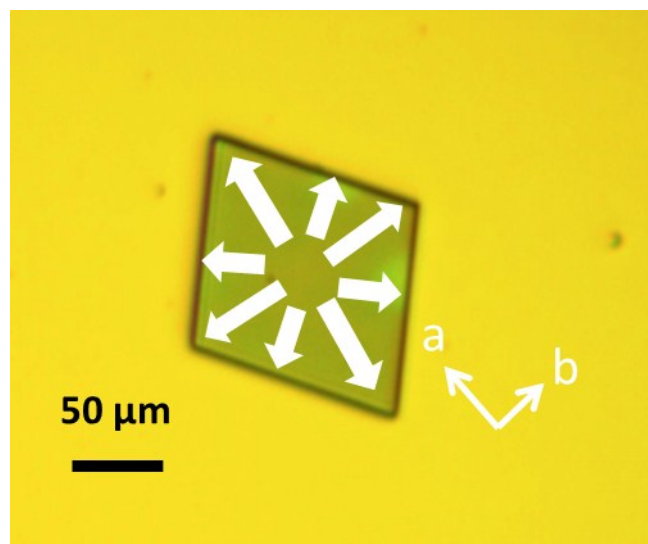

**Supporting Information Figure S6.** Typical parallelogram shape of a single crystal grown in zone 3.

## REFERENCES

1. Xie, W. et al. Temperature-independent transport in high-mobility dinaphtho-thieno-thiophene (DNTT) single crystal transistors. *Adv. Mater.* 25, 3478-3484 (2013).
2. Li, H. et al. High-performance transistors and complementary inverters based on solution-grown aligned organic single-crystals. *Adv. Mater.* 24, 2588-2591 (2012).
3. Liu, J. et al. Thin film field-effect transistors of 2,6-diphenyl anthracene (DPA). *Chem. Commun. (Camb.)* 51, 11777-11779 (2015).
4. Schweicher, G. et al. Bulky end-capped [1]benzothieno[3,2-b]benzothiophenes: reaching high-mobility organic semiconductors by fine tuning of the crystalline solid-state order. *Adv. Mater.* 27, 3066-3072 (2015).
5. Park, J. I. et al. Dibenzothiopheno[6,5-b:6',5'-f]thieno[3,2-b]thiophene (DBTTT): high-performance small-molecule organic semiconductor for field-effect transistors. *J. Am. Chem. Soc.* 137, 12175–12178 (2015).
